# Supplementary material for: An increased cell cycle gene network determines MEK and Akt inhibitor double resistance in triple-negative breast cancer
Source: PubMed Central journal article supplement (PMC6746778; doi:10.1038/s41598-019-49809-3), 2019-09-16
Supplement: 41598_2019_49809_MOESM1_ESM.pdf [file 41598_2019_49809_MOESM1_ESM.pdf]

## **Supplementary material for:**

**An increased cell cycle gene network determines MEK and Akt inhibitor double resistance in triple-negative breast cancer.**

Vera E. van der Noord<sup>1, 3</sup>, Ronan P. McLaughlin<sup>1, 3</sup>, Marcel Smid<sup>2</sup>, John A. Foekens<sup>2</sup>, John W.M. Martens<sup>2</sup>, Yinghui Zhang<sup>1</sup>, Bob van de Water<sup>1, \*</sup>

<sup>1</sup>Division of Drug Discovery and Safety, Leiden Academic Center for Drug Research, Leiden University, PO box 9502, 2300 RA Leiden, The Netherlands

<sup>2</sup>Department of Medical Oncology, Erasmus MC Cancer Institute, Erasmus University Medical Center, PO Box 2040, 3000 CA Rotterdam, The Netherlands

<sup>3</sup>These authors contributed equally to the work.

\*Corresponding author: Professor Bob van de Water, Division of Drug Discovery and Safety, Leiden Academic Center for Drug Research, Leiden University, Einsteinweg 55, PO box 9502, 2300 RA Leiden, The Netherlands. Email:

b.water@lacdr.leidenuniv.nl

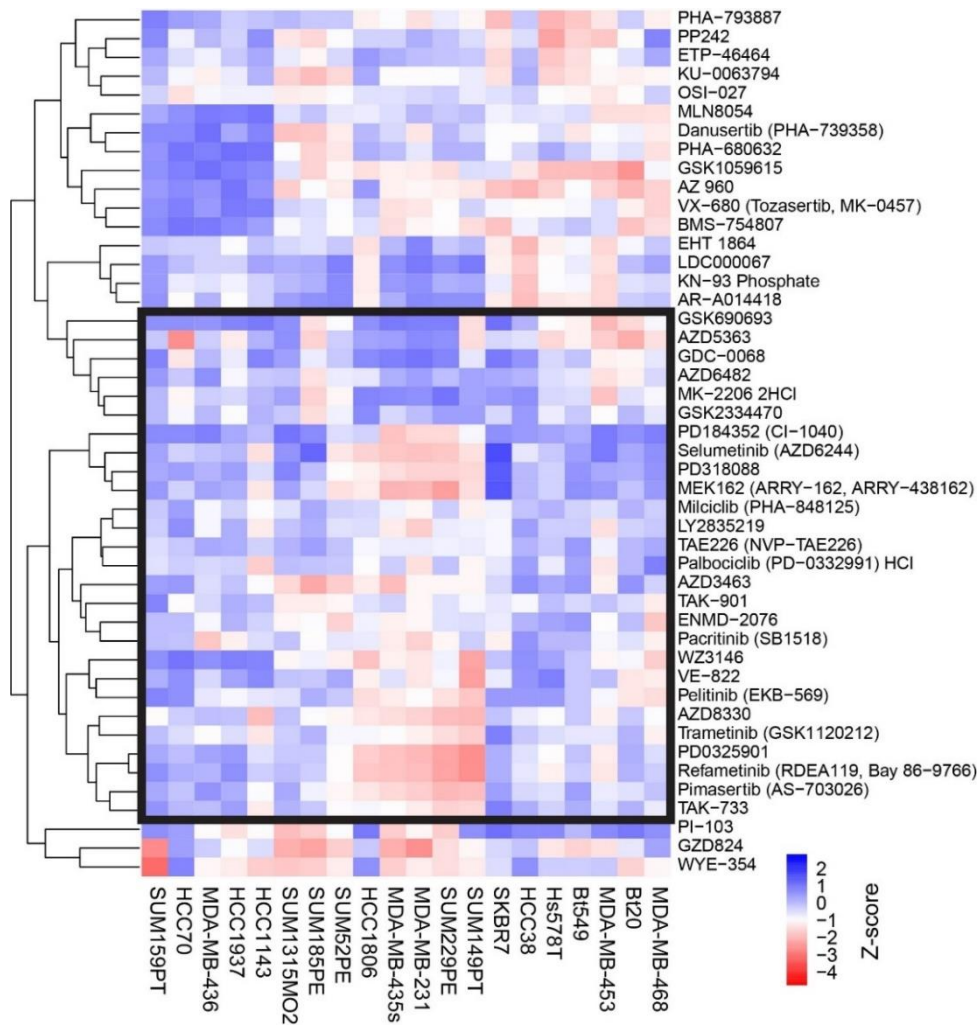

**Supplementary Figure S1.** Clustered kinase inhibitors differentially affecting TNBC cell proliferation. Enlarged and annotation version of the clustered branch of differentially effective kinase inhibitors from Figure 1A. The black box highlights mainly MEK and Akt inhibitors. Low Z-scores (red) indicate reduced cell proliferation, whereas high Z-scores indicate resistance (blue) upon treatment with the kinase inhibitors (1  $\mu$ M).

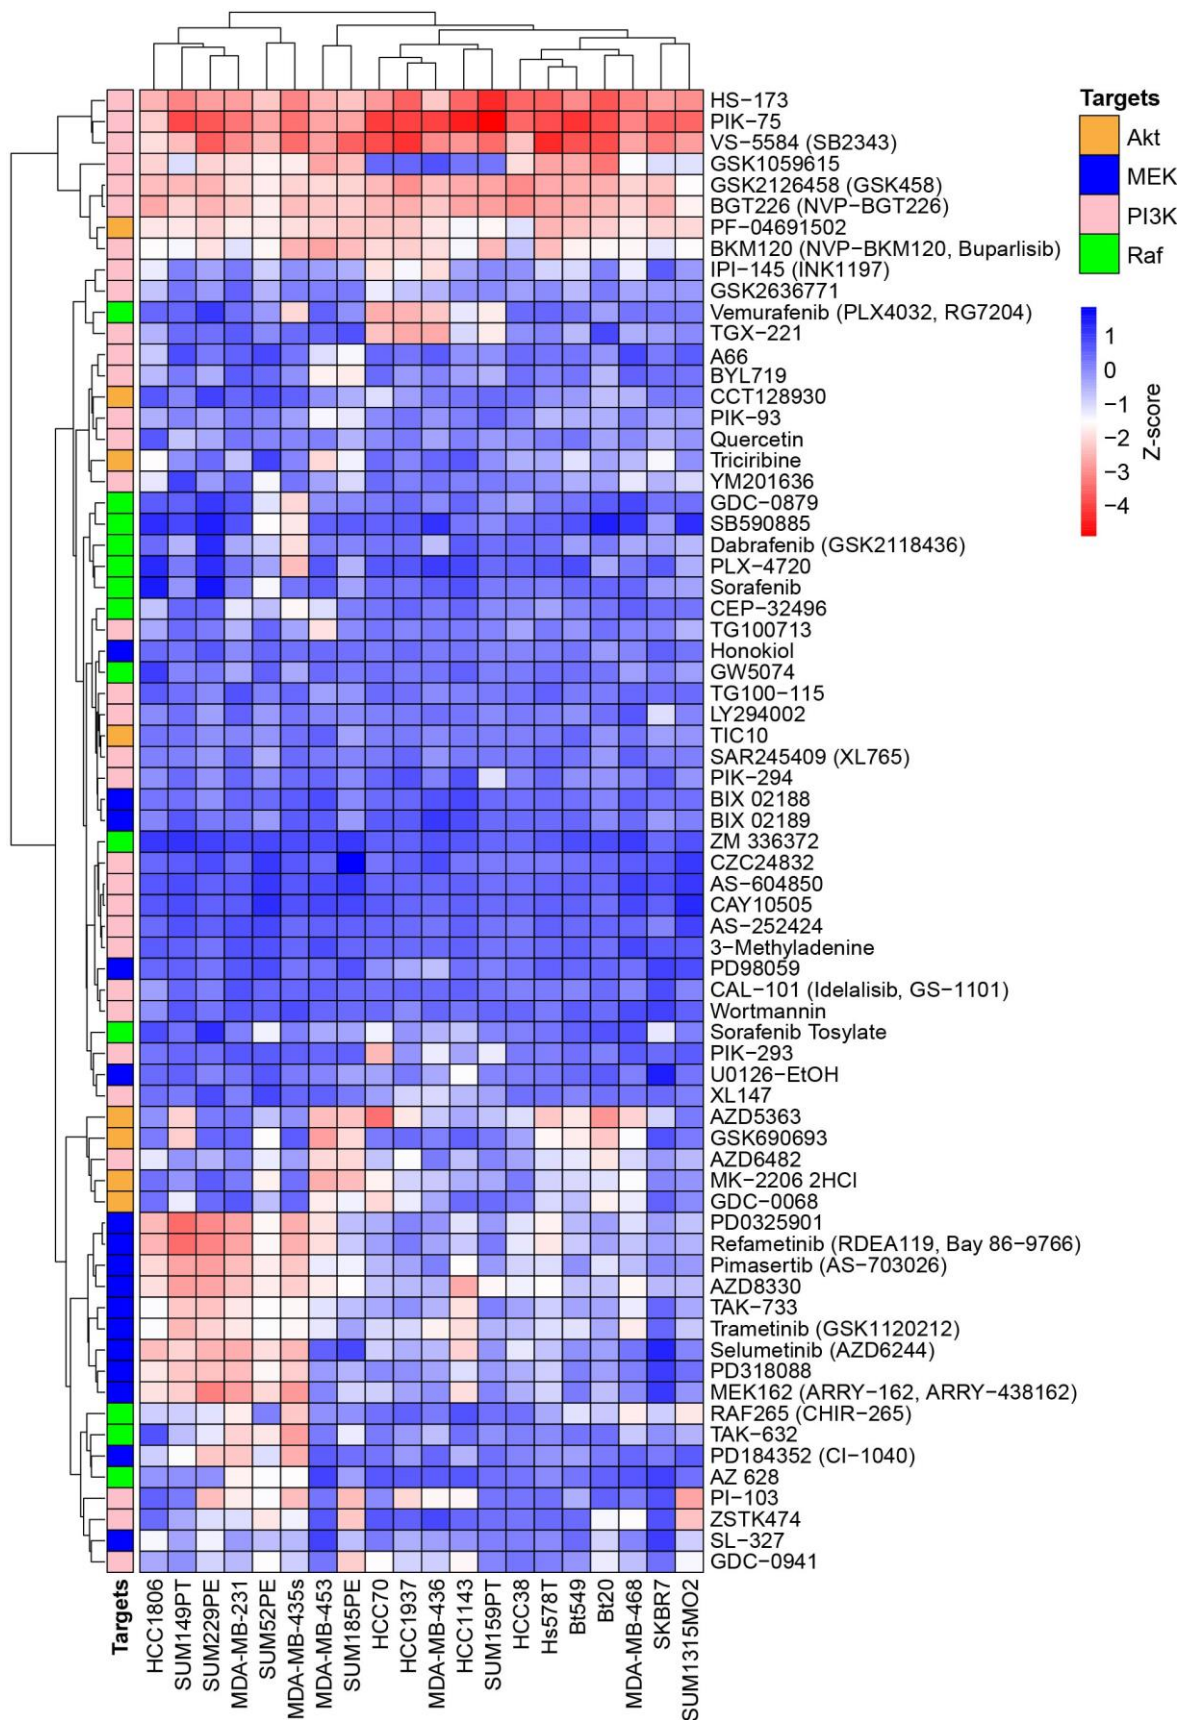

**Supplementary Figure S2.** Proliferative responses to MEK, Akt, Raf and PI3K inhibitors (1  $\mu$ M) among TNBC cell lines. Low Z-scores (red) indicate reduced cell proliferation, whereas high Z-scores indicate resistance (blue) upon treatment with the kinase inhibitors.

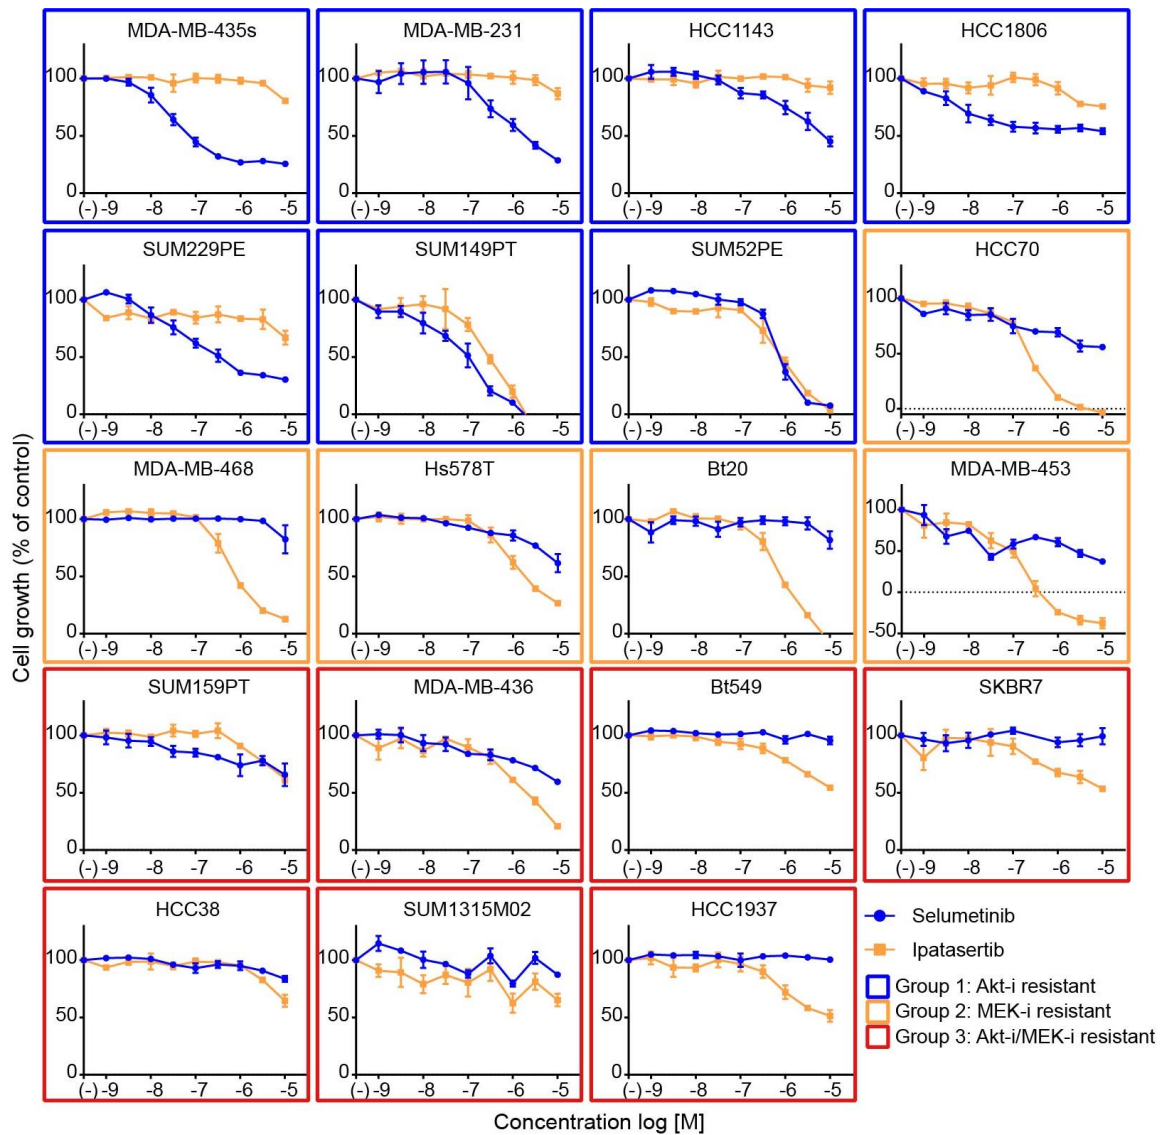

**Supplementary Figure S3.** Sensitivity profiling in TNBC cell lines. Validation of Akt-i/MEK-i sensitivity classifications from primary screening (Figure 1B). Proliferative responses of cell lines to increasing concentrations (0.001-10  $\mu\text{M}$ ) of selumetinib (MEK-i) and ipatasertib (Akt-i) are shown.

## Source images Figure 2

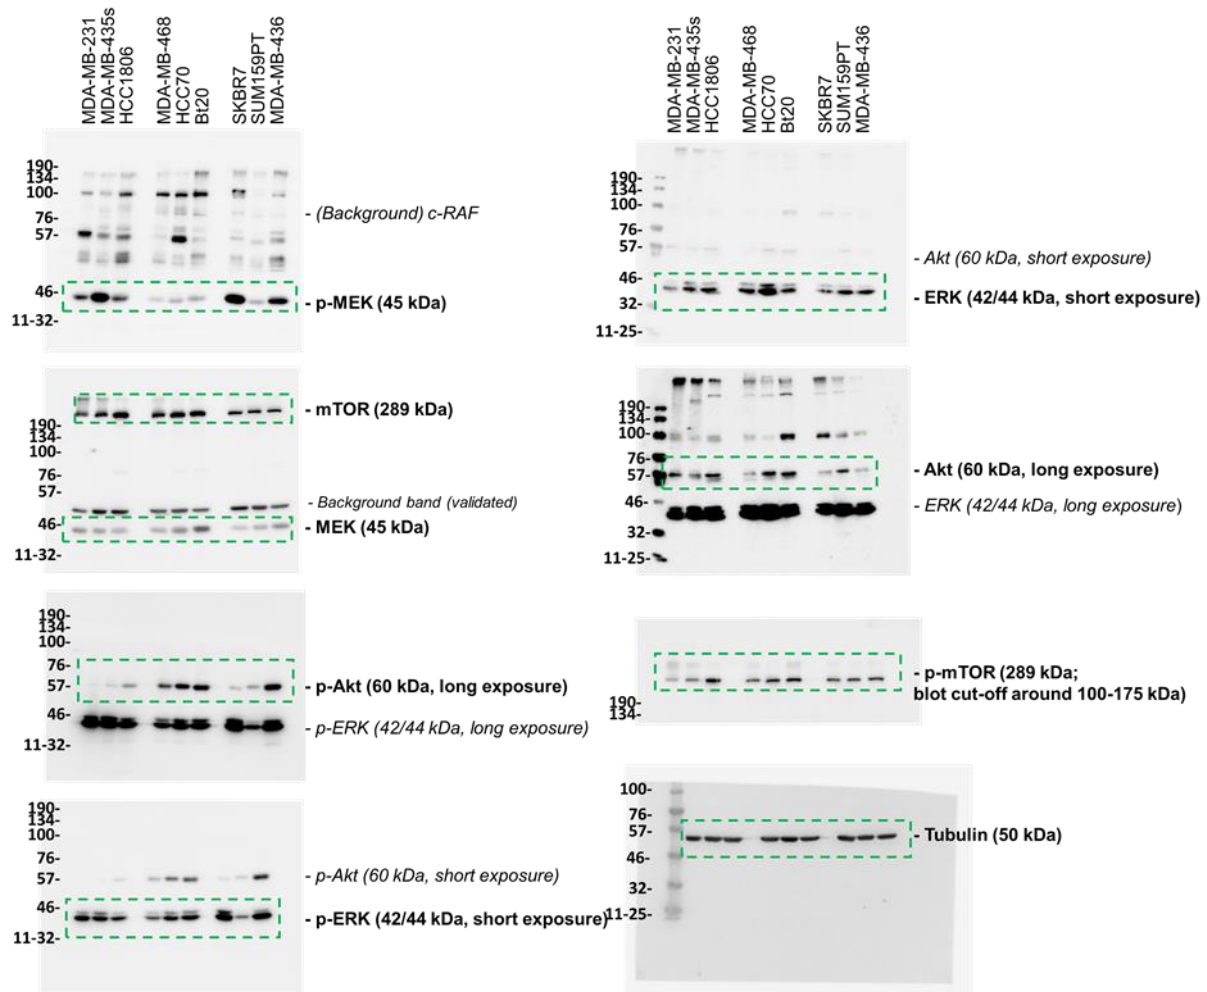

**Supplementary Figure S4. Uncropped full-length images of blots.** Source images for the western blot bands presented in Figure 2, 3 and 6. Green dotted squares indicate the approximate cropping area. Antibody combinations were previously tested to not interfere with each others bands. In some cases, blots were cut horizontally to perform separate stainings and full-length blots are not depicted. Protein sizes are according to pre-stained protein ladders from Cell signalling (#13953) or Thermo Fisher (#26619).

### Source images Figure 3

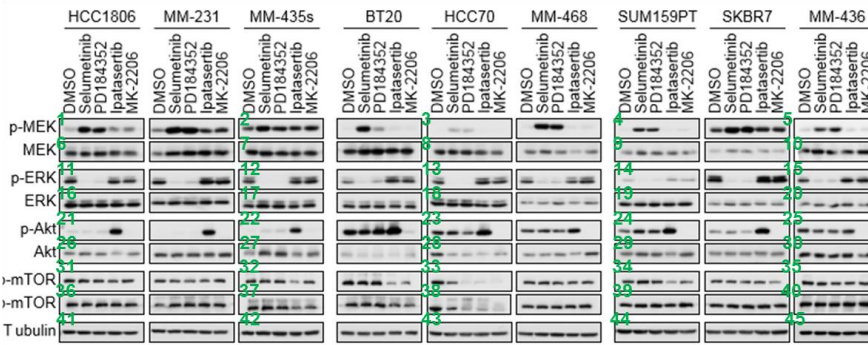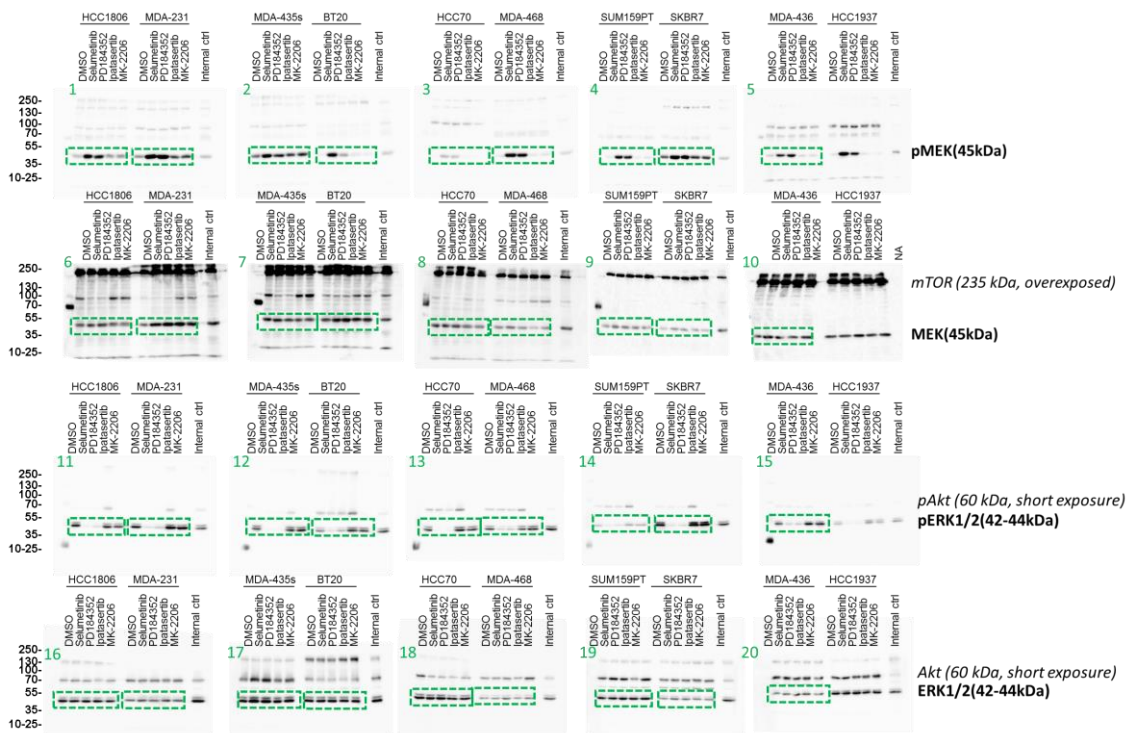

**Supplementary Figure S4. Uncropped full-length images of blots (continued).** Source images for the western blot bands presented in Figure 2, 3 and 6. Green dotted squares indicate the approximate cropping area. Antibody combinations were previously tested to not interfere with each others bands. In some cases, blots were cut horizontally to perform separate stainings and full-length blots are not depicted. Protein sizes are according to pre-stained protein ladders from Cell signalling (#13953) or Thermo Fisher (#26619).

Source images Figure 3 (continued)

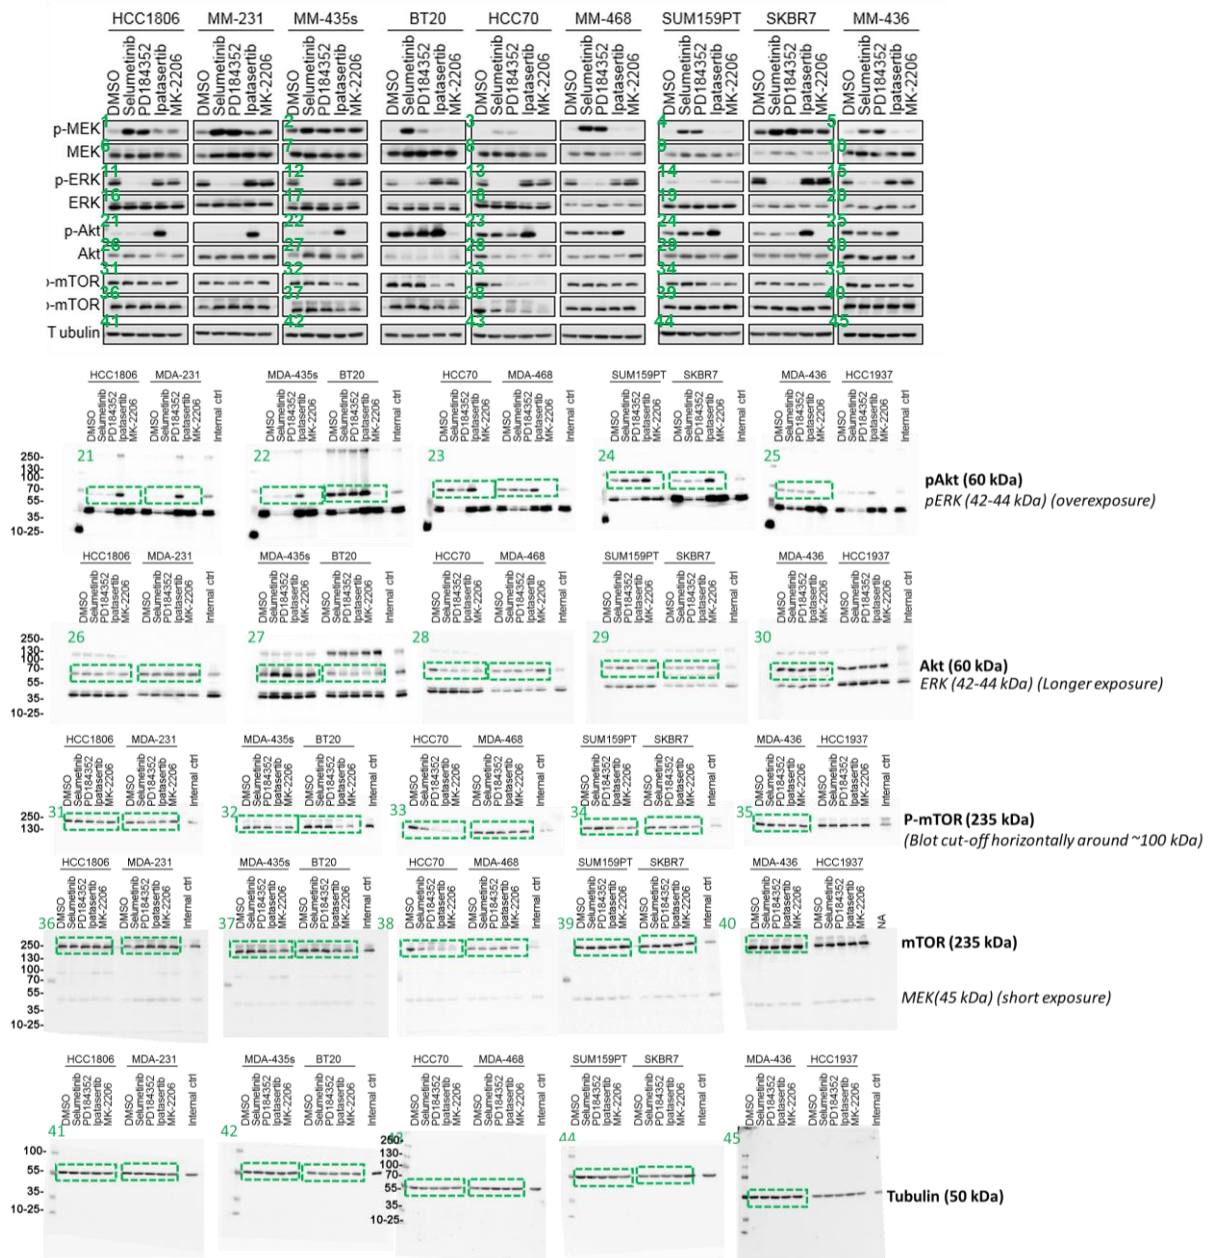

**Supplementary Figure S4. Uncropped full-length images of blots (continued).** Source images for the western blot bands presented in Figure 2, 3 and 6. Green dotted squares indicate the approximate cropping area. Antibody combinations were previously tested to not interfere with each others bands. In some cases, blots were cut horizontally to perform separate stainings and full-length blots are not depicted. Protein sizes are according to pre-stained protein ladders from Cell signalling (#13953) or Thermo Fisher (#26619).

**Source images Figure 6:**

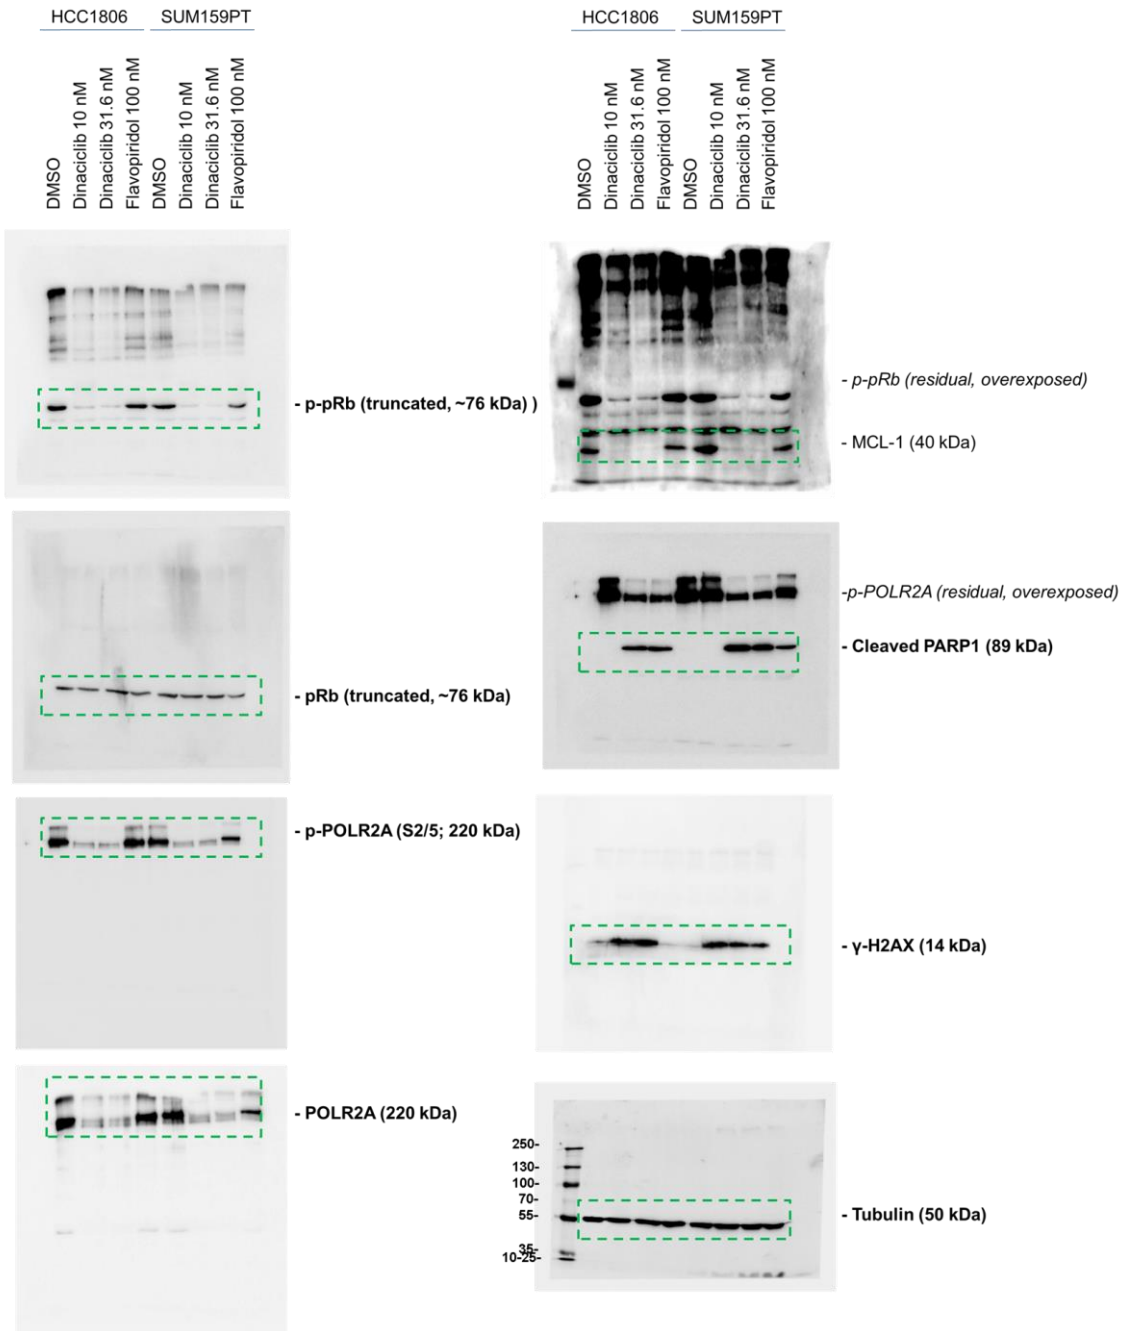

**Supplementary Figure S4. Uncropped full-length images of blots (continued).** Source images for the western blot bands presented in Figure 2, 3 and 6. Green dotted squares indicate the approximate cropping area. Antibody combinations were previously tested to not interfere with each others bands. In some cases, blots were cut horizontally to perform separate stainings and full-length blots are not depicted. Protein sizes are according to pre-stained protein ladders from Cell signalling (#13953) or Thermo Fisher (#26619).







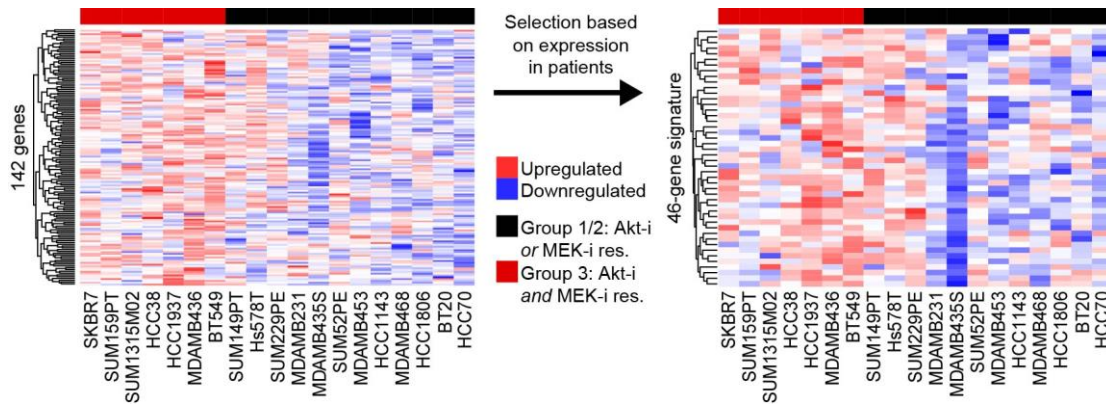

**Supplementary Figure S7.** Expression of the 142 cell cycle genes and the selected 46 clinically differentially expressed genes in TNBC cell lines. The mRNA expression of the 142 cell cycle genes, as given in Figure 4B, and of the later selected 46 clinically differentially expressed genes, as shown in Figure 5, in the TNBC cell lines is shown.



**Supplementary Table S2. Common mutations in cell lines in components of the PI3K, MAPK, cell cycle and DNA damage repair pathways.** Mutations in Cancer Gene Census genes were deduced from the COSMIC database (<http://cancer.sanger.ac.uk/cosmic>).

|                        | PI3K        | MAPK            | PI3K/<br>MAPK       | Cell cycle                           | DNA damage<br>repair                  |              |
|------------------------|-------------|-----------------|---------------------|--------------------------------------|---------------------------------------|--------------|
| 1) Akt-i resistant     | HCC1143     |                 | FGFR2               | TP53                                 |                                       |              |
|                        | MDA-MB-435s |                 | BRAF                | TP53, CDKN2A,<br>EP300               |                                       |              |
|                        | MDA-MB-231  |                 | BRAF,NF1            | PDGFRA,<br>KRAS                      | TP53, CDKN2A                          |              |
|                        | HCC1806     |                 | NFATC2, ROS1        | PDGFRB                               | TP53, CDKN2A                          |              |
|                        | SUM229PE    |                 |                     | KRAS                                 | CDKN2A                                |              |
|                        | SUM52PE     |                 |                     |                                      | TP53, CDKN2A                          |              |
|                        | SUM149PT    |                 |                     |                                      | TP53, CDKN2A,<br>EP300                | BRCA1        |
| 2) MEK-i resistant     | HCC70       | PTEN            |                     | TP53, RB1                            |                                       |              |
|                        | MDA-MB-453  | PIK3CA,<br>PTEN | ROS1                | CREBBP, ATM,<br>STAG2                | CREBBP, ATM                           |              |
|                        | SUM185PE    | PIK3CA          |                     | TP53                                 |                                       |              |
|                        | BT20        | PIK3CA          |                     | ATM, CDKN2C,<br>CDKN2A, RB1,<br>TP53 | MLH1                                  |              |
|                        | Hs578T      | PIK3R1          | NF1                 | HRAS                                 | TP53, CDKN2A,<br>POLE                 | POLE         |
|                        | MDA-MB-468  | PTEN            | CACNA1D,<br>MAP3K13 |                                      | TP53, CDKN2A,<br>RB1                  |              |
| 3) Akt/MEK-i resistant | BT549       | PTEN            |                     | FGFR1                                | TP53, RB1,<br>BUB1B, (DCTN1),<br>PCM1 | MUTYH        |
|                        | SKBR7       |                 |                     | KRAS,<br>NRAS                        | CDKN2A                                |              |
|                        | HCC1937     | PTEN            | MAPK13              |                                      | TP53, RB1                             | BRCA1        |
|                        | MDA-MB-436  | PIK3R1          |                     |                                      | TP53, RB1                             | BRCA1, POLE  |
|                        | HCC38       |                 | IKBKB               |                                      | TP53, CDKN2A                          | PMS2, BRCA1* |
|                        | SUM159PT    | PIK3CA          |                     | HRAS                                 | TP53                                  |              |
|                        | SUM1315MO2  | PIK3CA          |                     |                                      | TP53                                  | BRCA1        |

\* methylation

**Supplementary Table S3. Enriched cell cycle genes in Akt-i/MEK-i resistant group 3 cell lines.** From the significantly enriched, cell cycle associated, gene sets, enriched genes or proteins (signal-to-noise < 0.1) were used for further analysis.

| mRNA expression |                 | Protein expression |                 | Shared       |                        |                           |
|-----------------|-----------------|--------------------|-----------------|--------------|------------------------|---------------------------|
| PROBE           | Signal-to-noise | PROBE              | Signal-to-noise | PROBE        | Signal-to-noise (mRNA) | Signal-to-noise (protein) |
| 1. SNAP25       | 0.710           | 1. SEC13           | 0.797           | 1. PSMD11    | 0.447                  | 0.631                     |
| 2. STX11        | 0.640           | 2. RUVBL1          | 0.765           | 2. PSMC2     | 0.379                  | 0.632                     |
| 3. KAT2B        | 0.530           | 3. PSMC4           | 0.737           | 3. SEC13     | 0.124                  | 0.797                     |
| 4. PPP2R3B      | 0.528           | 4. PSMD3           | 0.737           | 4. PSMD3     | 0.107                  | 0.737                     |
| 5. SGOL1        | 0.499           | 5. PSMA3           | 0.693           | 5. PSMD1     | 0.106                  | 0.678                     |
| 6. PTRF         | 0.489           | 6. PSMD1           | 0.678           | 6. PCM1      | 0.409                  | 0.336                     |
| 7. TUBB4A       | 0.448           | 7. PSMA4           | 0.670           | 7. PSMD12    | 0.103                  | 0.611                     |
| 8. PSMD11       | 0.447           | 8. CKAP5           | 0.666           | 8. PSMA7     | 0.139                  | 0.574                     |
| 9. CDC25A       | 0.425           | 9. YWHAG           | 0.647           | 9. PSMB7     | 0.117                  | 0.571                     |
| 10. STX2        | 0.423           | 10. PSMC2          | 0.632           | 10. ORC5     | 0.240                  | 0.424                     |
| 11. PCM1        | 0.409           | 11. PSMD11         | 0.631           | 11. RPS27    | 0.108                  | 0.545                     |
| 12. CENPI       | 0.393           | 12. PSMD12         | 0.611           | 12. PSMD9    | 0.375                  | 0.239                     |
| 13. PSMC2       | 0.379           | 13. RUVBL2         | 0.604           | 13. CCNB1    | 0.170                  | 0.415                     |
| 14. PSMD9       | 0.375           | 14. PSMD4          | 0.589           | 14. CDC23    | 0.267                  | 0.308                     |
| 15. NINL        | 0.360           | 15. PSMA7          | 0.574           | 15. GINS4    | 0.143                  | 0.414                     |
| 16. POLR3D      | 0.332           | 16. PSMB7          | 0.571           | 16. ACTR1A   | 0.150                  | 0.375                     |
| 17. RFC3        | 0.316           | 17. PSMA1          | 0.569           | 17. CUL1     | 0.164                  | 0.338                     |
| 18. HIST1H2A    | 0.308           | 18. SKP1           | 0.557           | 18. ANAPC7   | 0.141                  | 0.338                     |
| 19. CENPO       | 0.298           | 19. RPS27          | 0.545           | 19. NDC80    | 0.104                  | 0.360                     |
| 20. PPP2R1B     | 0.293           | 20. CDK4           | 0.533           | 20. CDK2     | 0.138                  | 0.316                     |
| 21. RPA4        | 0.289           | 21. PSME2          | 0.526           | 21. CDK5RAP2 | 0.180                  | 0.255                     |
| 22. GTF3C3      | 0.284           | 22. PSMC5          | 0.514           | 22. TYMS     | 0.228                  | 0.198                     |
| 23. GTF2H2      | 0.283           | 23. PSMD8          | 0.504           | 23. SPC25    | 0.209                  | 0.147                     |
| 24. SNAPC1      | 0.277           | 24. RBX1           | 0.498           | 24. PPP2CB   | 0.107                  | 0.223                     |
| 25. TUBA1A      | 0.274           | 25. NUDC           | 0.487           | 25. ZWILCH   | 0.154                  | 0.176                     |
| 26. POLR1A      | 0.274           | 26. PSMC1          | 0.478           | 26. ERCC6L   | 0.175                  | 0.127                     |
| 27. CDK6        | 0.269           | 27. PSME1          | 0.478           | 27. KIF2A    | 0.117                  | 0.143                     |
| 28. CDC23       | 0.267           | 28. PSMB4          | 0.472           | 28. GINS1    | 0.115                  | 0.141                     |
| 29. LIN54       | 0.250           | 29. PSMD13         | 0.466           | 29. SYNE1    | 0.112                  | 0.120                     |
| 30. STX4        | 0.245           | 30. DCTN2          | 0.445           | 30. MAX      | 0.116                  | 0.116                     |
| 31. CEP250      | 0.244           | 31. RPS27A         | 0.443           |              |                        |                           |
| 32. ORC5        | 0.240           | 32. CLASP1         | 0.442           |              |                        |                           |
| 33. CDC6        | 0.235           | 33. UBE2E1         | 0.440           |              |                        |                           |
| 34. TFDP1       | 0.232           | 34. MAGED1         | 0.438           |              |                        |                           |
| 35. MCM6        | 0.232           | 35. DCTN3          | 0.435           |              |                        |                           |
| 36. ATRIP       | 0.229           | 36. ORC5           | 0.424           |              |                        |                           |
| 37. TYMS        | 0.228           | 37. UBE2I          | 0.423           |              |                        |                           |
| 38. WRAP53      | 0.223           | 38. CUL5           | 0.422           |              |                        |                           |
| 39. NUP43       | 0.222           | 39. CCNB1          | 0.415           |              |                        |                           |
| 40. BUB1        | 0.220           | 40. GINS4          | 0.414           |              |                        |                           |

|              |       |              |       |
|--------------|-------|--------------|-------|
| 41. BRCA1    | 0.218 | 41. PSMD7    | 0.382 |
| 42. VAMP1    | 0.218 | 42. ACTR1A   | 0.375 |
| 43. E2F1     | 0.211 | 43. PAFAH1B1 | 0.365 |
| 44. STX1B    | 0.210 | 44. PSMB1    | 0.364 |
| 45. SPC25    | 0.209 | 45. PSMC3    | 0.361 |
| 46. TUBG1    | 0.205 | 46. NDC80    | 0.360 |
| 47. ERCC6    | 0.205 | 47. PSMD6    | 0.355 |
| 48. SKA1     | 0.201 | 48. CLIP1    | 0.352 |
| 49. CCNE1    | 0.199 | 49. XPO1     | 0.347 |
| 50. ORC1     | 0.199 | 50. ANAPC2   | 0.338 |
| 51. TAOK1    | 0.192 | 51. CUL1     | 0.338 |
| 52. CCNE2    | 0.190 | 52. PCM1     | 0.336 |
| 53. HIST1H4J | 0.187 | 53. ANAPC7   | 0.333 |
| 54. GTF2H2B  | 0.187 | 54. LMNA     | 0.331 |
| 55. CCNA2    | 0.184 | 55. KIF2C    | 0.328 |
| 56. CDKN2C   | 0.181 | 56. CDK2     | 0.316 |
| 57. CDK5RAP  | 0.180 | 57. TUBGCP2  | 0.314 |
| 58. TUBGCP5  | 0.179 | 58. TCEB2    | 0.309 |
| 59. BTRC     | 0.178 | 59. CDC23    | 0.308 |
| 60. PSMB2    | 0.177 | 60. PSMB5    | 0.288 |
| 61. ERCC6L   | 0.175 | 61. DYNLL1   | 0.279 |
| 62. CENPK    | 0.172 | 62. PSMB8    | 0.277 |
| 63. CCNB1    | 0.170 | 63. CDK5RAP2 | 0.255 |
| 64. POLE2    | 0.169 | 64. PSMD2    | 0.251 |
| 65. CEP135   | 0.167 | 65. NUF2     | 0.248 |
| 66. CUL1     | 0.164 | 66. PSMD9    | 0.239 |
| 67. RBBP4    | 0.163 | 67. CETN2    | 0.233 |
| 68. DNA2     | 0.161 | 68. PSMC6    | 0.232 |
| 69. DIDO1    | 0.160 | 69. DYNC1I2  | 0.232 |
| 70. PPP2R2A  | 0.156 | 70. KIF20A   | 0.226 |
| 71. CEP72    | 0.156 | 71. RPA1     | 0.226 |
| 72. ZWILCH   | 0.154 | 72. PPP2CB   | 0.223 |
| 73. HAUS2    | 0.152 | 73. HSPA2    | 0.222 |
| 74. CENPH    | 0.151 | 74. PSMD10   | 0.217 |
| 75. CDC25C   | 0.150 | 75. PPP2R1A  | 0.206 |
| 76. ACTR1A   | 0.150 | 76. FEN1     | 0.200 |
| 77. TAF1B    | 0.147 | 77. TYMS     | 0.198 |
| 78. MCM10    | 0.147 | 78. MNAT1    | 0.178 |
| 79. UBTF     | 0.145 | 79. PPP2R5D  | 0.177 |
| 80. MCM4     | 0.144 | 80. ZWILCH   | 0.176 |
| 81. CDC27    | 0.144 | 81. ANAPC5   | 0.176 |
| 82. ANAPC10  | 0.143 | 82. PRKACA   | 0.166 |
| 83. LIN52    | 0.143 | 83. ORC2     | 0.166 |
| 84. GINS4    | 0.143 | 84. SEH1L    | 0.155 |
| 85. SNAPC3   | 0.142 | 85. YWHAE    | 0.153 |
| 86. SNAPC4   | 0.142 | 86. DCTN1    | 0.150 |
| 87. SGOL2    | 0.142 | 87. PSMA2    | 0.150 |
| 88. PLK4     | 0.141 | 88. HSP90AA1 | 0.149 |

|              |       |             |       |
|--------------|-------|-------------|-------|
| 89. ANAPC7   | 0.141 | 89. NUP37   | 0.148 |
| 90. MIS18A   | 0.139 | 90. SPC25   | 0.147 |
| 91. PSMA7    | 0.139 | 91. KIF2A   | 0.143 |
| 92. CDK2     | 0.138 | 92. TERF2   | 0.141 |
| 93. ZW10     | 0.138 | 93. GINS1   | 0.141 |
| 94. KIF18A   | 0.138 | 94. PAK2    | 0.132 |
| 95. CDCA8    | 0.136 | 95. ERCC6L  | 0.127 |
| 96. CCDC99   | 0.135 | 96. SYNE1   | 0.120 |
| 97. PRIM2    | 0.134 | 97. MAX     | 0.116 |
| 98. CEP41    | 0.134 | 98. PSMD5   | 0.112 |
| 99. TFAM     | 0.134 | 99. CDC16   | 0.106 |
| 100.CDC20    | 0.132 | 100.PSMA5   | 0.104 |
| 101.POLR3H   | 0.129 | 101.DYNC1H1 | 0.103 |
| 102.CEP76    | 0.126 | 102.MAPRE1  | 0.101 |
| 103.POLA1    | 0.126 |             |       |
| 104.AURKA    | 0.125 |             |       |
| 105.BIRC5    | 0.124 |             |       |
| 106.SEC13    | 0.124 |             |       |
| 107.CEP63    | 0.123 |             |       |
| 108.SMC1A    | 0.123 |             |       |
| 109.POLR1D   | 0.122 |             |       |
| 110.BRF2     | 0.119 |             |       |
| 111.KIF2A    | 0.117 |             |       |
| 112.PSMB7    | 0.117 |             |       |
| 113.B9D2     | 0.117 |             |       |
| 114.SPC24    | 0.117 |             |       |
| 115.MAX      | 0.116 |             |       |
| 116.STX1A    | 0.116 |             |       |
| 117.CEP164   | 0.115 |             |       |
| 118.SMARCA5  | 0.115 |             |       |
| 119.CDKN2A   | 0.115 |             |       |
| 120.PLK1     | 0.115 |             |       |
| 121.ORC3     | 0.115 |             |       |
| 122.GINS1    | 0.115 |             |       |
| 123.CDC26    | 0.113 |             |       |
| 124.SYNE1    | 0.112 |             |       |
| 125.RAD17    | 0.112 |             |       |
| 126.DSN1     | 0.111 |             |       |
| 127.HIST1H2A | 0.110 |             |       |
| 128.POLR3GL  | 0.110 |             |       |
| 129.CDK7     | 0.109 |             |       |
| 130.RPS27    | 0.108 |             |       |
| 131.PSMD3    | 0.107 |             |       |
| 132.PPP2CB   | 0.107 |             |       |
| 133.CASC5    | 0.107 |             |       |
| 134.PSMD1    | 0.106 |             |       |
| 135.MYBL2    | 0.106 |             |       |
| 136.ORC6     | 0.105 |             |       |



|                   |       |
|-------------------|-------|
| <b>137.NDC80</b>  | 0.104 |
| <b>138.SSNA1</b>  | 0.104 |
| <b>139.PSMD12</b> | 0.103 |
| <b>140.SSB</b>    | 0.101 |
| <b>141.MCM2</b>   | 0.100 |
| <b>142.MCM8</b>   | 0.100 |

**Supplementary Table S4.** Differential sensitivity of group 3 cell lines to CDK inhibitors dinaciclib and flavopiridol. IC50 values for selected cell lines from Group 1 (Akt-i-resistant), Group 2 (MEK-i-resistant) and Group 3 (Akt-i/MEK-i double-resistant) for pan-CDK inhibitors dinaciclib and flavopiridol. IC50 values were calculated using non-linear regression fitting in GraphPad Prism.

| IC50 ( $\mu\text{M}$ ) | Group 1 (Akt-i-resistant) |             | Group 2 (MEK-i-resistant) |        | Group 3 (Akt-i/MEK-i-resistant) |            |          |
|------------------------|---------------------------|-------------|---------------------------|--------|---------------------------------|------------|----------|
|                        | HCC1806                   | MDA-MB-435s | BT20                      | HCC70  | SKBR7                           | MDA-MB-436 | SUM159PT |
| <b>Dinaciclib</b>      | 0.2973                    | 0.3121      | 0.2069                    | 0.1371 | 0.1465                          | 0.1095     | 0.1543   |
| <b>Flavopiridol</b>    | 0.4887                    | 0.2758      | 0.149                     | 0.1246 | 0.09521                         | 0.1775     | 0.1768   |
